# Supplementary material
Source: Springer Nature journal article supplement (https://www.springermedizin.de/resource/supplementary/13045_2010_123_MOESM3_ESM.pdf/9660702)

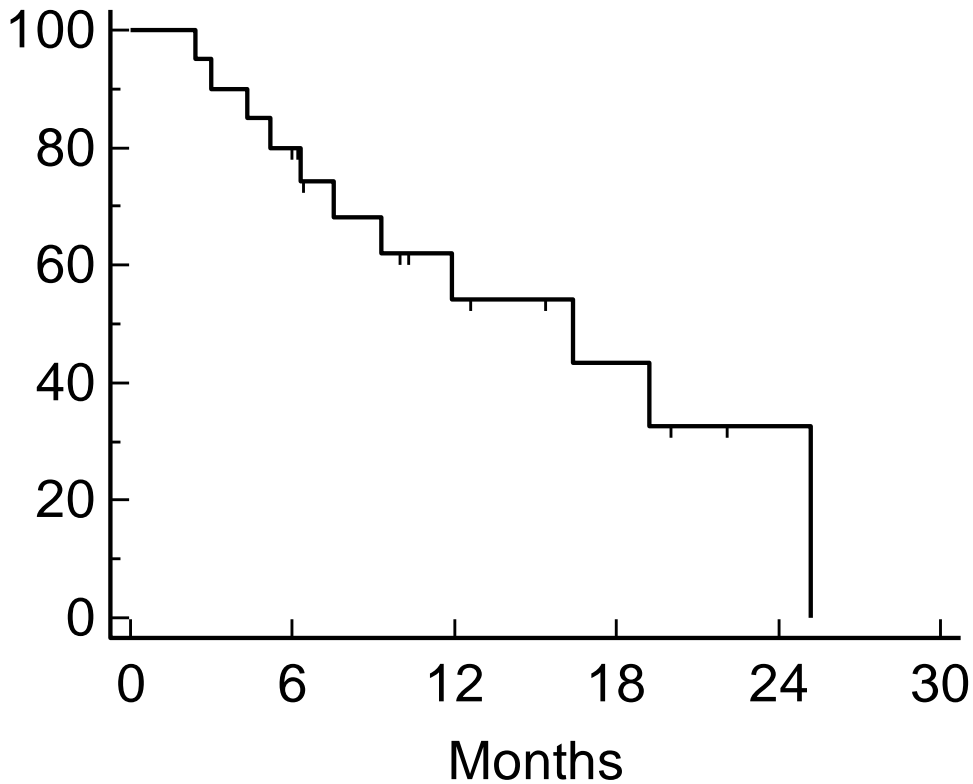

Supplement: MOESM3 [file 9660702]
